# Supplementary material
Source: publisher figshare collection journal article supplement (https://gsapubs.figshare.com/ndownloader/files/25467761)
Supplement: Supplementary file 1 [file 25467761]

## Sheet: Whole-rock Sr-Nd isotopes
TABLE S3. The whole-rock Sr-Nd isotopes results of volcanic/volcaniclastic rocks and intrusions samples from the Shuanglong area in the Aqishan-Yamansu belt, Eastern Tianshan.
Rock type	Sample	Age (Ma)	Rb (ppm)	Sr (ppm)	87Rb/86Sr	87Sr/86Sr	2σ	ISr	Sm (ppm)	Nd (ppm)	147Sm/144Nd	143Nd/144Nd	2σ	fSm/Nd	εNd(t)	TDM (Ga)
Rhyolite (the lower member, Yamansu Fm.)	SL17-20	341	77.7	90.5	2.48625	0.718129	1.04726e-05	0.706061	3.29	10.4	0.191154	0.512368	5.3457e-06	-0.0281965	3.30795	0.828295
Rhyolitic tuff (the lower member, Yamansu Fm.)	SL17-225	333.2	11.1	259	0.123967	0.706702	7.71007e-06	0.706114	5.55	22.7	0.147736	0.512511	5.6379e-06	-0.248925	5.90256	0.610321
	SL17-226	333.2	11.1	103	0.311776	0.708404	8.07552e-06	0.706925	6.06	23.7	0.154506	0.512422	5.76693e-06	-0.214511	4.15567	0.752797
Andesitic tuff (the lower member, Tugutubulak Fm.)	SL17-29	319.1	61	134	1.31713	0.709506	9.20083e-06	0.703524	2.53	7.5	0.203835	0.51263	5.72436e-06	0.0362753	7.8708	0.438012
Andesitic tuff (the upper member, Tugutubulak Fm.)	SL17-247	312	45.6	479	0.275337	0.705588	1.22736e-05	0.704365	3.5	14.1	0.149992	0.512438	4.95815e-06	-0.237456	3.93301	0.753528
	SL17-248	312	45.7	397	0.332952	0.70605	9.48491e-06	0.704572	2.85	11.4	0.151064	0.512553	6.22283e-06	-0.232009	6.17811	0.570386
	SL17-250	312	55.4	366	0.437821	0.706334	1.25554e-05	0.70439	3.25	14.7	0.133594	0.512462	5.97376e-06	-0.320825	4.40438	0.715094
Rhyolitic ignimbrite (the upper member, Tugutubulak Fm.)	SL17-45	312	125	233	1.5525	0.711253	1.12087e-05	0.704359	3.21	15.1	0.128454	0.512575	7.88851e-06	-0.346954	6.62285	0.53408
Diorite	SL17-31	317.1	11.7	291	0.114789	0.703835	1.24185e-05	0.703333	2.44	11.2	0.131641	0.512622	6.29429e-06	-0.330751	7.68631	0.452176
	SL17-210	317.1	35	326	0.306518	0.705319	1.16992e-05	0.703978	3.1	13.5	0.138755	0.512598	4.70243e-06	-0.294586	7.23107	0.490182
Monzogranite	SL17-193	311	177.5	83.2	6.18619	0.731596	1.1453e-05	0.703837	1.1	5.2	0.127823	0.512561	4.2469e-06	-0.350162	6.42921	0.552605
Granite porphyry	SL17-8	306.9	229	89.1	7.45622	0.736576	1.25477e-05	0.704011	4.12	18.4	0.135301	0.512564	6.22559e-06	-0.312148	6.27105	0.558601
Quartz diorite	SL17-175	275.5	36.7	634	0.167393	0.703848	9.66957e-06	0.703192	2.28	10.2	0.135069	0.512656	4.22244e-06	-0.313326	7.27791	0.450521
	SL17-192	275.5	23.6	710	0.0961226	0.704097	9.82829e-06	0.70372	2.22	10.2	0.131514	0.512653	5.76833e-06	-0.331396	7.21213	0.455895
Diorite porphyry	SL17-14	275.1	64.6	623	0.299862	0.704208	1.15371e-05	0.703034	3.43	16.4	0.126378	0.512718	6.37031e-06	-0.35751	8.47469	0.352389
	SL17-30	274.9	29.1	685	0.122848	0.703972	9.10578e-06	0.703491	2.19	9.4	0.140779	0.512678	4.27234e-06	-0.284298	7.71269	0.414997
		3
